# Supplementary material for: New Insights on Glutathione’s Supramolecular Arrangement and Its In Silico Analysis as an Angiotensin-Converting Enzyme Inhibitor
Source: MDPI journal article supplement (doi:10.3390/molecules27227958), 2022-11-17
Supplement: s1 [file s1]

# New insights on Glutathione's Supramolecular Arrangement and Its In Silico Analysis as an Angiotensin-Converting Enzyme Inhibitor

Antônio S. N. Aguiar <sup>1,\*</sup>, Igor D. Borges <sup>1,2</sup>, Leonardo L. Borges <sup>1,3</sup>, Lucas D. Dias <sup>1,4</sup>, Ademir J. Camargo <sup>1</sup>, Pál Perjesi <sup>4</sup> and Hamilton B. Napolitano <sup>1,4,\*</sup>

<sup>1</sup> Grupo de Química Teórica e Estrutural de Anápolis, Universidade Estadual de Goiás, Anápolis, GO, Brazil

<sup>2</sup> Centro de Pesquisa e Eficiência Energética, CAO A Montadora de Veículos LTDA, Anápolis, GO, Brazil

<sup>3</sup> Escola de Ciências Médicas e da Vida, Pontifícia Universidade Católica de Goiás, Goiânia, GO, Brazil

<sup>4</sup> Laboratório de Novos Materiais, Universidade Evangélica de Goiás, Anápolis 75083-515, GO, Brazil

\* Correspondence: toninho.quimica@gmail.com (A.S.N.A.); hbnapolitano@gmail.com (H.B.N.)

## SUPPLEMENTARY MATERIAL

**Table S1.** Second-order perturbation theory analysis in NBO basis obtained at M06-2X/6-311++G(d,p) level of theory for the GSHA polymorph.

| Interaction                        | Occupancy | Donor<br>NBO ( <i>i</i> )       | Hybrids                                                      | Occupancy | Acceptor<br>NBO ( <i>j</i> )      | Hybrids                                                      | $E^{(2)}$<br>(kcal/mol) | $\epsilon_{(j)} - \epsilon_{(i)}$<br>(a.u.) | $F(i, j)$<br>(a.u.) |
|------------------------------------|-----------|---------------------------------|--------------------------------------------------------------|-----------|-----------------------------------|--------------------------------------------------------------|-------------------------|---------------------------------------------|---------------------|
| S–H...O <sub>2</sub>               | 1.99199   | $\eta_1(\text{S})$              | S: $sp^{0.66}$                                               | 0.06022   | $\sigma^*(\text{C}_5\text{-O}_2)$ | C <sub>5</sub> : $sp^{2.04}$<br>O <sub>2</sub> : $sp^{1.80}$ | 0.07                    | 1.27                                        | 0.009               |
|                                    | 1.99341   | $\sigma(\text{C}_5\text{-O}_2)$ | C <sub>5</sub> : $sp^{2.04}$<br>O <sub>2</sub> : $sp^{1.80}$ | 0.01311   | $\sigma^*(\text{S-H})$            | S: $sp^{3.34}$<br>H: $s$                                     | 0.08                    | 1.47                                        | 0.01                |
|                                    | 1.98348   | $\pi(\text{C}_5\text{-O}_2)$    | C <sub>5</sub> : $p$<br>O <sub>2</sub> : $p$                 | 0.01311   | $\sigma^*(\text{S-H})$            | S: $sp^{3.34}$<br>H: $s$                                     | 0.98                    | 0.84                                        | 0.026               |
|                                    | 1.88395   | $\eta_2(\text{O}_1)$            | O <sub>1</sub> : $p$                                         | 0.01311   | $\sigma^*(\text{S-H})$            | S: $sp^{3.34}$<br>H: $s$                                     | 0.10                    | 0.74                                        | 0.008               |
|                                    | 1.9791    | $\eta_1(\text{O}_2)$            | O <sub>2</sub> : $sp^{0.58}$                                 | 0.01311   | $\sigma^*(\text{S-H})$            | S: $sp^{3.34}$<br>H: $s$                                     | 0.24                    | 1.2                                         | 0.015               |
|                                    | 1.88406   | $\eta_2(\text{O}_2)$            | O <sub>2</sub> : $p$                                         | 0.01311   | $\sigma^*(\text{S-H})$            | S: $sp^{3.34}$<br>H: $s$                                     | 1.53                    | 0.72                                        | 0.03                |
| N <sub>2</sub> –H...O <sub>2</sub> | 1.71526   | $\eta_1(\text{N}_2)$            | N <sub>2</sub> : $p$                                         | 0.05091   | $\sigma^*(\text{C}_5\text{-O}_5)$ | C <sub>5</sub> : $sp^{1.94}$<br>O <sub>2</sub> : $sp^{1.68}$ | 0.24                    | 0.91                                        | 0.014               |
|                                    | 1.97429   | $\eta_1(\text{O}_2)$            | O <sub>2</sub> : $sp^{0.60}$                                 | 0.0208    | $\sigma^*(\text{N}_2\text{-H})$   | N <sub>2</sub> : $sp^{1.95}$<br>H: $sp^{1.68}$               | 2.01                    | 1.69                                        | 0.052               |
|                                    | 1.89151   | $\eta_2(\text{O}_2)$            | O <sub>2</sub> : $p$                                         | 0.0208    | $\sigma^*(\text{N}_2\text{-H})$   | N <sub>2</sub> : $sp^{1.95}$<br>H: $sp^{1.68}$               | 2.93                    | 1.21                                        | 0.054               |
| O <sub>6</sub> –H...O <sub>3</sub> | 1.98034   | $\sigma(\text{O}_6\text{-H})$   | O <sub>6</sub> : $sp^{2.01}$<br>H: $sp^{2.01}$               | 0.02804   | $\sigma^*(\text{C}_4\text{-O}_3)$ | C <sub>4</sub> : $sp^{2.20}$<br>O <sub>3</sub> : $sp^{1.49}$ | 0.13                    | 1.59                                        | 0.013               |
|                                    | 1.98034   | $\sigma(\text{O}_6\text{-H})$   | O <sub>6</sub> : $sp^{2.01}$<br>H: $sp^{2.01}$               | 0.29654   | $\pi^*(\text{C}_4\text{-O}_3)$    | C <sub>4</sub> : $p$<br>O <sub>3</sub> : $p$                 | 0.20                    | 1.01                                        | 0.014               |
|                                    | 1.95731   | $\eta_1(\text{O}_6)$            | O <sub>6</sub> : $sp^{2.89}$                                 | 0.02804   | $\sigma^*(\text{C}_4\text{-O}_3)$ | C <sub>4</sub> : $sp^{2.20}$<br>O <sub>3</sub> : $sp^{1.49}$ | 0.13                    | 1.17                                        | 0.011               |
|                                    | 1.95731   | $\eta_1(\text{O}_6)$            | O <sub>6</sub> : $sp^{2.89}$                                 | 0.07635   | $\pi^*(\text{C}_8\text{-O}_4)$    | C <sub>8</sub> : $sp^{2.80}$<br>O <sub>4</sub> : $sp^{2.26}$ | 1.83                    | 0.75                                        | 0.035               |
|                                    | 1.96552   | $\eta_1(\text{O}_3)$            | O <sub>3</sub> : $sp^{0.73}$                                 | 0.03126   | $\sigma^*(\text{O}_6\text{-H})$   | O <sub>6</sub> : $sp^{2.01}$<br>H: $s$                       | 8.52                    | 1.71                                        | 0.108               |

|                                    |         |                                 |                                                              |     |         |                                      |                                                               |      |      |       |
|------------------------------------|---------|---------------------------------|--------------------------------------------------------------|-----|---------|--------------------------------------|---------------------------------------------------------------|------|------|-------|
|                                    | 1.88081 | $\eta_2(\text{O}_3)$            | O <sub>3</sub> :                                             | $p$ | 0.03126 | $\sigma^*(\text{O6-H})$              | O <sub>6</sub> : $sp^{2.01}$<br>H: $s$                        | 9.45 | 1.27 | 0.100 |
|                                    | 1.9927  | $\sigma(\text{C}_4\text{-O}_3)$ | C <sub>4</sub> : $sp^{2.20}$<br>O <sub>3</sub> : $sp^{1.49}$ |     | 0.03126 | $\sigma^*(\text{O6-H})$              | O <sub>6</sub> : $sp^{2.01}$<br>H: $s$                        | 0.16 | 2.07 | 0.016 |
|                                    | 1.98922 | $\pi(\text{C}_4\text{-O}_3)$    | C <sub>4</sub> : $p$<br>O <sub>3</sub> : $p$                 |     | 0.03126 | $\sigma^*(\text{O6-H})$              | O <sub>6</sub> : $sp^{2.01}$<br>H: $s$                        | 1.50 | 1.4  | 0.041 |
| N <sub>3</sub> -H...O <sub>5</sub> | 1.68454 | $\eta_1(\text{N3})$             | N <sub>3</sub> :                                             | $p$ | 0.02682 | $\sigma^*(\text{C}_{10}\text{-O}_5)$ | C <sub>10</sub> : $sp^{1.94}$<br>O <sub>5</sub> : $sp^{1.42}$ | 0.14 | 1    | 0.012 |
|                                    | 1.86223 | $\eta_2(\text{O}_5)$            | O <sub>5</sub> :                                             | $p$ | 0.01319 | $\sigma^*(\text{N3-H})$              | N <sub>3</sub> : $sp^{2.12}$<br>H: $s$                        | 1.63 | 1.21 | 0.041 |
| C <sub>2</sub> -H...O <sub>4</sub> | 1.97281 | $\sigma(\text{C}_2\text{-H})$   | C <sub>2</sub> : $sp^{2.74}$<br>H: $s$                       |     | 0.0208  | $\sigma^*(\text{N2-H})$              | N <sub>2</sub> : $sp^{1.95}$<br>H: $s$                        | 0.27 | 1.56 | 0.018 |

**Table S2.** Second-order perturbation theory analysis in NBO basis obtained at M06-2X/6-311++G(d,p) level of theory for the GSHB polymorph.

| Interaction                        | Occupancy | Donor<br>NBO ( <i>i</i> )       | Hybrids                                                      | Occupancy | Acceptor<br>NBO ( <i>j</i> )      | Hybrids                                                      | $E^{(2)}$<br>(kcal/mol) | $\epsilon_{(j)} - \epsilon_{(i)}$<br>(a.u.) | $F(i, j)$<br>(a.u.) |
|------------------------------------|-----------|---------------------------------|--------------------------------------------------------------|-----------|-----------------------------------|--------------------------------------------------------------|-------------------------|---------------------------------------------|---------------------|
| S-H...O <sub>1</sub>               | 1.96681   | $\sigma(\text{C}_9\text{-H})$   | C <sub>9</sub> : $sp^{3.03}$<br>H: $s$                       | 0.01589   | $\sigma^*(\text{C}_2\text{-H})$   | C <sub>2</sub> : $sp^{3.50}$<br>H: $s$                       | 0.72                    | 1.04                                        | 0.025               |
|                                    | 1.99282   | $\eta_1(\text{S})$              | S: $sp^{0.50}$                                               | 0.05303   | $\sigma^*(\text{O}_1\text{-C}_5)$ | O <sub>1</sub> : $sp^{1.57}$<br>C <sub>5</sub> : $sp^{1.98}$ | 0.07                    | 1.37                                        | 0.009               |
|                                    | 1.97472   | $\sigma(\text{C}_2\text{-H})$   | C <sub>2</sub> : $sp^{3.50}$<br>H: $s$                       | 0.01790   | $\sigma^*(\text{C}_9\text{-H})$   | C <sub>9</sub> : $sp^{3.03}$<br>H: $s$                       | 0.94                    | 1.05                                        | 0.028               |
|                                    | 1.97342   | $\eta_1(\text{O}_1)$            | O <sub>1</sub> : $sp^{0.64}$                                 | 0.01938   | $\sigma^*(\text{S-H})$            | S: $sp^{4.87}$<br>H: $s$                                     | 2.23                    | 1.04                                        | 0.043               |
|                                    | 1.87540   | $\eta_2(\text{O}_1)$            | O <sub>1</sub> : $p$                                         | 0.01938   | $\sigma^*(\text{S-H})$            | S: $sp^{4.87}$<br>H: $s$                                     | 0.61                    | 0.57                                        | 0.017               |
|                                    | 1.62112   | $\eta_3(\text{O}_1)$            | O <sub>1</sub> : $p$                                         | 0.01938   | $\sigma^*(\text{S-H})$            | S: $sp^{4.87}$<br>H: $s$                                     | 2.56                    | 0.54                                        | 0.037               |
| N <sub>1</sub> -H...O <sub>1</sub> | 1.98990   | $\sigma(\text{N}_1\text{-H})$   | N <sub>1</sub> : $sp^{2.87}$                                 | 0.05358   | $\sigma^*(\text{O}_1\text{-C}_5)$ | O <sub>1</sub> : $sp^{1.54}$<br>C <sub>5</sub> : $sp^{1.97}$ | 0.10                    | 1.41                                        | 0.011               |
|                                    | 1.99493   | $\sigma(\text{O}_1\text{-C}_5)$ | O <sub>1</sub> : $sp^{1.54}$<br>C <sub>5</sub> : $sp^{1.97}$ | 0.04675   | $\sigma^*(\text{N}_1\text{-H})$   | N <sub>1</sub> : $sp^{3.10}$<br>H: $s$                       | 0.05                    | 1.58                                        | 0.008               |
|                                    | 1.96840   | $\eta_1(\text{O}_1)$            | O <sub>1</sub> : $sp^{0.65}$                                 | 0.04675   | $\sigma^*(\text{N}_1\text{-H})$   | N <sub>1</sub> : $sp^{3.10}$<br>H: $s$                       | 6.25                    | 1.26                                        | 0.079               |
|                                    | 1.87638   | $\eta_2(\text{O}_1)$            | O <sub>1</sub> : $p$                                         | 0.04675   | $\sigma^*(\text{N}_1\text{-H})$   | N <sub>1</sub> : $sp^{3.10}$<br>H: $s$                       | 1.73                    | 0.79                                        | 0.034               |
|                                    | 1.62453   | $\eta_3(\text{O}_1)$            | O <sub>1</sub> : $p$                                         | 0.04675   | $\sigma^*(\text{N}_1\text{-H})$   | N <sub>1</sub> : $sp^{3.10}$<br>H: $s$                       | 0.95                    | 0.76                                        | 0.026               |
|                                    | 1.99091   | $\sigma(\text{N}_1\text{-H})$   | N <sub>1</sub> : $sp^{2.73}$                                 | 0.05358   | $\sigma^*(\text{O}_1\text{-C}_5)$ | O <sub>1</sub> : $sp^{1.54}$<br>C <sub>5</sub> : $sp^{1.97}$ | 0.09                    | 1.41                                        | 0.01                |
| N <sub>1</sub> -H...O <sub>2</sub> | 1.99086   | $\sigma(\text{N}_1\text{-H})$   | N <sub>1</sub> : $sp^{3.10}$                                 | 0.04917   | $\sigma^*(\text{O}_2\text{-C}_5)$ | O <sub>1</sub> : $sp^{1.53}$<br>C <sub>5</sub> : $sp^{2.01}$ | 0.11                    | 1.29                                        | 0.011               |
|                                    | 1.99086   | $\sigma(\text{N}_1\text{-H})$   | N <sub>1</sub> : $sp^{3.10}$                                 | 0.37882   | $\pi^*(\text{O}_2\text{-C}_5)$    | O <sub>1</sub> : $p$<br>C <sub>5</sub> : $p$                 | 0.10                    | 0.72                                        | 0.008               |
|                                    | 1.99255   | $\sigma(\text{O}_2\text{-C}_5)$ | O <sub>2</sub> : $sp^{1.73}$<br>C <sub>5</sub> : $sp^{1.95}$ | 0.03759   | $\sigma^*(\text{N}_1\text{-H})$   | N <sub>1</sub> : $sp^{2.73}$<br>H: $s$                       | 0.24                    | 1.61                                        | 0.018               |
|                                    | 1.87311   | $\eta_2(\text{O}_2)$            | O <sub>2</sub> : $p$                                         | 0.03759   | $\sigma^*(\text{N}_1\text{-H})$   | N <sub>1</sub> : $sp^{2.73}$<br>H: $s$                       | 15.51                   | 0.87                                        | 0.106               |
| N <sub>2</sub> -H...O <sub>2</sub> | 1.98365   | $\sigma(\text{N}_2\text{-H})$   | N <sub>2</sub> : $sp^{2.34}$<br>H: $s$                       | 0.37882   | $\pi^*(\text{O}_2\text{-C}_5)$    | O <sub>2</sub> : $p$<br>C <sub>5</sub> : $p$                 | 0.18                    | 1.3                                         | 0.014               |
|                                    | 1.99255   | $\sigma(\text{O}_2\text{-C}_5)$ | O <sub>2</sub> : $sp^{1.73}$<br>C <sub>5</sub> : $sp^{1.95}$ | 0.03353   | $\sigma^*(\text{N}_2\text{-H})$   | N <sub>2</sub> : $sp^{2.34}$<br>H: $s$                       | 0.15                    | 1.65                                        | 0.014               |
|                                    | 1.95852   | $\eta_2(\text{O}_2)$            | O <sub>2</sub> : $p$                                         | 0.03353   | $\sigma^*(\text{N}_2\text{-H})$   | N <sub>2</sub> : $sp^{2.34}$<br>H: $s$                       | 6.80                    | 1.36                                        | 0.086               |
| C <sub>3</sub> -H...O <sub>2</sub> | 1.97934   | $\sigma(\text{C}_3\text{-H})$   | C <sub>3</sub> : $sp^{3.41}$<br>H: $s$                       | 0.37882   | $\sigma^*(\text{O}_2\text{-C}_5)$ | O <sub>2</sub> : $p$<br>C <sub>5</sub> : $p$                 | 0.12                    | 0.55                                        | 0.008               |
|                                    | 1.68940   | $\eta_1(\text{N}_3)$            | N <sub>3</sub> : $p$                                         | 0.02517   | $\sigma^*(\text{C}_6\text{-H})$   | C <sub>6</sub> : $sp^{3.22}$<br>H: $s$                       | 0.06                    | 0.71                                        | 0.006               |
| N <sub>1</sub> -H...O <sub>4</sub> | 1.99182   | $\sigma(\text{N}_1\text{-H})$   | N <sub>1</sub> : $sp^{2.85}$                                 | 0.06532   | $\sigma^*(\text{O}_4\text{-C}_8)$ | O <sub>4</sub> : $sp^{1.94}$                                 | 0.17                    | 1.3                                         | 0.013               |

|                                    |         |                                 |                              |         |                                      |                               |       |      |       |
|------------------------------------|---------|---------------------------------|------------------------------|---------|--------------------------------------|-------------------------------|-------|------|-------|
|                                    |         |                                 | H: $sp^{2.85}$               |         |                                      | C <sub>8</sub> : $sp^{2.73}$  |       |      |       |
|                                    | 1.98896 | $\pi(\text{O}_4\text{-C}_8)$    | O <sub>4</sub> : $p$         | 0.03821 | $\sigma^*(\text{N}_1\text{-H})$      | N <sub>1</sub> : $sp^{2.85}$  | 0.06  | 1.02 | 0.007 |
|                                    |         |                                 | C <sub>8</sub> : $p$         |         |                                      | H: $s$                        |       |      |       |
|                                    | 1.96655 | $\eta_1(\text{O}_4)$            | O <sub>4</sub> : $sp^{0.72}$ | 0.03821 | $\sigma^*(\text{N}_1\text{-H})$      | N <sub>1</sub> : $sp^{2.85}$  | 6.64  | 1.25 | 0.082 |
|                                    |         |                                 |                              |         |                                      | H: $s$                        |       |      |       |
|                                    | 1.88004 | $\eta_2(\text{O}_4)$            | O <sub>4</sub> : $p$         | 0.03821 | $\sigma^*(\text{N}_1\text{-H})$      | N <sub>1</sub> : $sp^{2.85}$  | 9.61  | 0.82 | 0.081 |
|                                    |         |                                 |                              |         |                                      | H: $s$                        |       |      |       |
| N <sub>3</sub> -H...O <sub>5</sub> | 1.98257 | $\sigma(\text{N}_3\text{-H})$   | N <sub>3</sub> : $sp^{2.37}$ | 0.03602 | $\sigma^*(\text{O}_5\text{-C}_{10})$ | O <sub>5</sub> : $sp^{1.62}$  | 0.10  | 1.35 | 0.011 |
|                                    |         |                                 | H: $s$                       |         |                                      | C <sub>10</sub> : $sp^{2.13}$ |       |      |       |
|                                    | 1.68499 | $\eta_1(\text{N}_3)$            | N <sub>3</sub> : $p$         | 0.03602 | $\sigma^*(\text{O}_5\text{-C}_{10})$ | O <sub>5</sub> : $sp^{1.62}$  | 0.05  | 0.91 | 0.007 |
|                                    |         |                                 |                              |         |                                      | C <sub>10</sub> : $sp^{2.13}$ |       |      |       |
|                                    | 1.68499 | $\eta_1(\text{N}_3)$            | N <sub>3</sub> : $p$         | 0.20915 | $\pi^*(\text{O}_5\text{-C}_{10})$    | O <sub>5</sub> : $p$          | 0.05  | 0.36 | 0.004 |
|                                    |         |                                 |                              |         |                                      | C <sub>10</sub> : $p$         |       |      |       |
|                                    | 1.96926 | $\eta_1(\text{O}_5)$            | O <sub>5</sub> : $sp^{0.69}$ | 0.05430 | $\sigma^*(\text{O}_3\text{-C}_4)$    | O <sub>3</sub> : $sp^{1.87}$  | 0.14  | 1.41 | 0.013 |
|                                    |         |                                 |                              |         |                                      | C <sub>4</sub> : $sp^{2.51}$  |       |      |       |
|                                    | 1.96926 | $\eta_1(\text{O}_5)$            | O <sub>5</sub> : $sp^{0.69}$ | 0.22712 | $\pi^*(\text{O}_3\text{-C}_4)$       | O <sub>3</sub> : $p$          | 1.16  | 0.97 | 0.032 |
|                                    |         |                                 |                              |         |                                      | C <sub>4</sub> : $p$          |       |      |       |
| O <sub>6</sub> -H...O <sub>3</sub> | 1.96926 | $\eta_1(\text{O}_5)$            | O <sub>5</sub> : $sp^{0.69}$ | 0.03034 | $\sigma^*(\text{N}_3\text{-H})$      | N <sub>3</sub> : $sp^{2.37}$  | 4.29  | 1.34 | 0.068 |
|                                    |         |                                 |                              |         |                                      | H: $s$                        |       |      |       |
|                                    | 1.86870 | $\eta_2(\text{O}_5)$            | O <sub>5</sub> : $p$         | 0.03034 | $\sigma^*(\text{N}_3\text{-H})$      | N <sub>3</sub> : $sp^{2.37}$  | 3.07  | 0.89 | 0.048 |
|                                    |         |                                 |                              |         |                                      | H: $s$                        |       |      |       |
|                                    | 1.98322 | $\sigma(\text{O}_6\text{-H})$   | O <sub>6</sub> : $sp^{2.67}$ | 0.21210 | $\pi^*(\text{O}_3\text{-C}_4)$       | O <sub>3</sub> : $p$          | 0.24  | 1.03 | 0.015 |
|                                    |         |                                 | H: $s$                       |         |                                      | C <sub>4</sub> : $p$          |       |      |       |
|                                    | 1.99014 | $\sigma(\text{O}_3\text{-C}_4)$ | O <sub>3</sub> : $sp^{2.41}$ | 0.05759 | $\sigma^*(\text{O}_6\text{-H})$      | O <sub>6</sub> : $sp^{2.67}$  | 0.46  | 1.53 | 0.024 |
|                                    |         |                                 | C <sub>4</sub> : $sp^{3.18}$ |         |                                      | H: $s$                        |       |      |       |
|                                    | 1.98680 | $\pi(\text{O}_3\text{-C}_4)$    | O <sub>3</sub> : $p$         | 0.05759 | $\sigma^*(\text{O}_6\text{-H})$      | O <sub>6</sub> : $sp^{2.67}$  | 0.18  | 1.18 | 0.013 |
|                                    |         |                                 | C <sub>4</sub> : $p$         |         |                                      | H: $s$                        |       |      |       |
|                                    | 1.96252 | $\eta_1(\text{O}_3)$            | O <sub>3</sub> : $sp^{0.74}$ | 0.05759 | $\sigma^*(\text{O}_6\text{-H})$      | O <sub>6</sub> : $sp^{2.67}$  | 7.80  | 1.33 | 0.092 |
|                                    |         |                                 |                              |         |                                      | H: $s$                        |       |      |       |
|                                    | 1.86499 | $\eta_2(\text{O}_3)$            | O <sub>3</sub> : $p$         | 0.05759 | $\sigma^*(\text{O}_6\text{-H})$      | O <sub>6</sub> : $sp^{2.67}$  | 22.01 | 0.93 | 0.13  |
|                                    |         |                                 |                              |         |                                      | H: $s$                        |       |      |       |
